# Supplementary material for: Quantum mechanical study of the solvent-dependence of electronic energy transfer rates in a Bodipy closely-spaced dyad
Source: Royal Society of Chemistry journal article supplement (doi:10.1039/c1pp05141e), 2011-07-21
Supplement: c1pp05141e.pdf [file c1pp05141e.pdf]

## Electronic Supplementary Information

# Quantum mechanical study of the solvent-dependence of electronic energy transfer rates in a Bodipy closely-spaced dyad

Stefano Caprasecca, Carles Curutchet and Benedetta Mennucci

**Table 1** Electronic couplings (in meV) and solvent screening factors derived from PCM-EET calculations

| Solvent                                         | B3LYP |           |      | CAM-B3LYP |           |      |
|-------------------------------------------------|-------|-----------|------|-----------|-----------|------|
|                                                 | $V_s$ | $V_{TOT}$ | $s$  | $V_s$     | $V_{TOT}$ | $s$  |
| Dioxane                                         | 9.81  | 5.73      | 0.58 | 11.84     | 7.00      | 0.59 |
| (C <sub>4</sub> H <sub>9</sub> ) <sub>2</sub> O | 9.53  | 5.75      | 0.60 | 11.57     | 7.07      | 0.61 |
| C <sub>6</sub> H <sub>5</sub> Cl                | 9.93  | 5.15      | 0.52 | 11.98     | 6.30      | 0.53 |
| CHCl <sub>3</sub>                               | 9.74  | 5.49      | 0.56 | 11.79     | 6.74      | 0.57 |
| (C <sub>2</sub> H <sub>5</sub> ) <sub>2</sub> O | 9.38  | 5.93      | 0.63 | 11.43     | 7.31      | 0.64 |
| EtOAc                                           | 9.31  | 5.77      | 0.62 | 11.36     | 7.13      | 0.63 |
| MTHF                                            | 9.37  | 5.57      | 0.60 | 11.41     | 6.87      | 0.60 |
| THF                                             | 9.45  | 5.58      | 0.59 | 11.51     | 6.88      | 0.60 |
| CH <sub>2</sub> Cl <sub>2</sub>                 | 9.65  | 5.54      | 0.57 | 11.72     | 6.82      | 0.58 |
| C <sub>4</sub> H <sub>9</sub> CN                | 9.21  | 5.52      | 0.60 | 11.26     | 6.83      | 0.61 |
| DMF                                             | 9.47  | 5.42      | 0.57 | 11.56     | 6.71      | 0.58 |
| C <sub>3</sub> H <sub>7</sub> CN                | 9.10  | 5.53      | 0.61 | 11.16     | 6.85      | 0.61 |
| PC                                              | 9.28  | 5.40      | 0.58 | 11.34     | 6.68      | 0.59 |
| C <sub>2</sub> H <sub>5</sub> CN                | 9.15  | 5.66      | 0.62 | 11.23     | 7.03      | 0.63 |
| CH <sub>3</sub> CN                              | 9.00  | 5.72      | 0.64 | 11.06     | 7.10      | 0.64 |

**Table 2** Transition dipole moments (in a.u.) derived from PCM-EET calculations

| Solvent                                         | Acceptor |           | Donor |           |
|-------------------------------------------------|----------|-----------|-------|-----------|
|                                                 | B3LYP    | CAM-B3LYP | B3LYP | CAM-B3LYP |
| Dioxane                                         | 5.124    | 5.122     | 3.020 | 3.299     |
| (C <sub>4</sub> H <sub>9</sub> ) <sub>2</sub> O | 5.121    | 5.120     | 2.984 | 3.273     |
| C <sub>6</sub> H <sub>5</sub> Cl                | 5.253    | 5.242     | 3.048 | 3.330     |
| CHCl <sub>3</sub>                               | 5.208    | 5.199     | 3.005 | 3.294     |
| (C <sub>2</sub> H <sub>5</sub> ) <sub>2</sub> O | 5.110    | 5.109     | 2.940 | 3.240     |
| EtOAc                                           | 5.137    | 5.135     | 2.940 | 3.244     |
| MTHF                                            | 5.173    | 5.168     | 2.961 | 3.261     |
| THF                                             | 5.198    | 5.190     | 2.962 | 3.263     |
| CH <sub>2</sub> Cl <sub>2</sub>                 | 5.252    | 5.236     | 2.974 | 3.273     |
| C <sub>4</sub> H <sub>9</sub> CN                | 5.195    | 5.188     | 2.937 | 3.246     |
| DMF                                             | 5.242    | 5.231     | 2.954 | 3.263     |
| C <sub>3</sub> H <sub>7</sub> CN                | 5.190    | 5.184     | 2.922 | 3.236     |
| PC                                              | 5.228    | 5.218     | 2.944 | 3.255     |
| C <sub>2</sub> H <sub>5</sub> CN                | 5.185    | 5.179     | 2.909 | 3.225     |
| CH <sub>3</sub> CN                              | 5.194    | 5.185     | 2.888 | 3.209     |

**Table 3** Distance between donor and acceptor centres of mass  $R_{DA}$  (in a.u.), and orientation factors  $\kappa$ , derived from geometries and transition dipole moments determined in each solvent

| Solvent                                         | $R_{DA}$ | $\kappa$ |           |
|-------------------------------------------------|----------|----------|-----------|
|                                                 |          | B3LYP    | CAM-B3LYP |
| Dioxane                                         | 38.26    | 1.5150   | 1.5167    |
| (C <sub>4</sub> H <sub>9</sub> ) <sub>2</sub> O | 38.32    | 1.5126   | 1.5145    |
| C <sub>6</sub> H <sub>5</sub> Cl                | 38.38    | 1.5132   | 1.5150    |
| CHCl <sub>3</sub>                               | 38.34    | 1.5178   | 1.5196    |
| (C <sub>2</sub> H <sub>5</sub> ) <sub>2</sub> O | 38.23    | 1.5143   | 1.5162    |
| EtOAc                                           | 38.34    | 1.5144   | 1.5164    |
| MTHF                                            | 38.42    | 1.5129   | 1.5149    |
| THF                                             | 38.39    | 1.5165   | 1.5184    |
| CH <sub>2</sub> Cl <sub>2</sub>                 | 38.36    | 1.5232   | 1.5251    |
| C <sub>4</sub> H <sub>9</sub> CN                | 38.44    | 1.5087   | 1.5107    |
| DMF                                             | 38.55    | 1.5401   | 1.5414    |
| C <sub>3</sub> H <sub>7</sub> CN                | 38.50    | 1.5101   | 1.5121    |
| PC                                              | 38.43    | 1.5084   | 1.5104    |
| C <sub>2</sub> H <sub>5</sub> CN                | 38.57    | 1.5358   | 1.5371    |
| CH <sub>3</sub> CN                              | 38.52    | 1.5198   | 1.5217    |
